# Supplementary material for: Theoretical study on the kinetic behavior of Np(vi) reduction by hydroxylamine and its derivatives: substituent effect
Source: Royal Society of Chemistry journal article supplement (doi:10.1039/d4cp04616a), 2025-01-01
Supplement: d4cp04616a1.pdf [file d4cp04616a1.pdf]

# **Theoretical study on the kinetic behavior of Np(VI) reduction with hydroxylamine and its derivatives: substituent effect**

Xin Huang,<sup>a,b</sup> Qun-Yan Wu,<sup>b\*</sup> Cong-Zhi Wang,<sup>b</sup> Jian-Hui Lan,<sup>b</sup> Hong-Qing Wang<sup>a\*</sup>  
and Wei-Qun Shi<sup>b,c\*</sup>

<sup>a</sup> School of Chemistry and Chemical Engineering, University of South China, Hengyang 421001, China

<sup>b</sup> Laboratory of Nuclear Energy Chemistry, Institute of High Energy Physics, Chinese Academy of Sciences, Beijing 100049, China

<sup>c</sup> School of Nuclear Science and Engineering, and Key Laboratory of Nuclear Power Systems and Equipment/Ministry of Education, Shanghai Jiao Tong University, Shanghai 200240, China

\*Email: [wuqy@ihep.ac.cn](mailto:wuqy@ihep.ac.cn). Tel: 86-10-88235242

\*Email: [hqwang2015@126.com](mailto:hqwang2015@126.com). Tel: 0724-8281676

\*E-mail: [shiwq@sjtu.edu.cn](mailto:shiwq@sjtu.edu.cn). Tel: 86-10-88233968

Table S1 The change of Gibbs energy ( $\Delta G$ , kcal mol<sup>-1</sup>) for the reduction reactions of [Np<sup>VI</sup>O<sub>2</sub>(H<sub>2</sub>O)<sub>5</sub>]<sup>2+</sup> by HA, MHA and DMHA and its protonated forms at B3LYP/ECP60MWB/6-31G(d).

| Reactions                                                                                                                                                                                                | $\Delta G(\text{kcal mol}^{-1})$ |
|----------------------------------------------------------------------------------------------------------------------------------------------------------------------------------------------------------|----------------------------------|
| $[\text{Np}^{\text{VI}}\text{O}_2(\text{H}_2\text{O})_5]^{2+} + \text{NH}_2\text{OH} = [\text{Np}^{\text{V}}\text{O}_2(\text{H}_2\text{O})_5]^+ + \text{NH}_2\text{O}\cdot + \text{H}^+$                 | -3.5                             |
| $[\text{Np}^{\text{VI}}\text{O}_2(\text{H}_2\text{O})_5]^{2+} + \text{NH}_3\text{OH}^+ = [\text{Np}^{\text{V}}\text{O}_2(\text{H}_2\text{O})_5]^+ + \text{NH}_2\text{O}\cdot + 2\text{H}^+$              | 7.3                              |
| $[\text{Np}^{\text{VI}}\text{O}_2(\text{H}_2\text{O})_5]^{2+} + \text{CH}_3\text{NHOH} = [\text{Np}^{\text{V}}\text{O}_2(\text{H}_2\text{O})_5]^+ + \text{CH}_3\text{NHO}\cdot + \text{H}^+$             | -6.4                             |
| $[\text{Np}^{\text{VI}}\text{O}_2(\text{H}_2\text{O})_5]^{2+} + \text{CH}_3\text{NH}_2\text{OH}^+ = [\text{Np}^{\text{V}}\text{O}_2(\text{H}_2\text{O})_5]^+ + \text{CH}_3\text{NHO}\cdot + 2\text{H}^+$ | 6.0                              |
| $[\text{Np}^{\text{VI}}\text{O}_2(\text{H}_2\text{O})_5]^{2+} + (\text{CH}_3)_2\text{NOH} = [\text{Np}^{\text{V}}\text{O}_2(\text{H}_2\text{O})_5]^+ + (\text{CH}_3)_2\text{NO}\cdot + \text{H}^+$       | -6.9                             |
| $[\text{Np}^{\text{VI}}\text{O}_2(\text{H}_2\text{O})_5]^{2+} + (\text{CH}_3)_2\text{NHOH}^+ = [\text{Np}^{\text{V}}\text{O}_2(\text{H}_2\text{O})_5]^+ + (\text{CH}_3)_2\text{NO}\cdot + 2\text{H}^+$   | 5.7                              |

Table S2. The values of  $\rho(r)$ ,  $\nabla^2\rho(r)$ ,  $H(r)$ ,  $G(r)$  and  $V(r)$  (au) of the N/O-H and H-O<sub>yl</sub> bonds for the structures of Np(VI) reduction with MHA at the B3LYP/ECP60MWB/6-31G(d) level of theory.

|                   | Bond                            | $\rho(r)$ | $\nabla^2\rho(r)$ | $H(r)$ | $G(r)$ | $V(r)$ | $-G(r)/V(r)$ |
|-------------------|---------------------------------|-----------|-------------------|--------|--------|--------|--------------|
| IC <sup>M1</sup>  | O-H <sub>O</sub>                | 0.336     | -1.818            | -0.512 | 0.058  | -0.570 | 0.101        |
|                   | H <sub>O</sub> -O <sub>yl</sub> | 0.024     | 0.082             | 0.000  | 0.020  | -0.020 | 1.005        |
| TS <sup>M1</sup>  | O-H <sub>O</sub>                | 0.307     | -1.594            | -0.454 | 0.056  | -0.510 | 0.109        |
|                   | H <sub>O</sub> -O <sub>yl</sub> | 0.043     | 0.137             | -0.001 | 0.035  | -0.037 | 0.970        |
| INT <sup>M1</sup> | O-H <sub>O</sub>                | 0.042     | 0.128             | -0.002 | 0.034  | -0.035 | 0.953        |
|                   | H <sub>O</sub> -O <sub>yl</sub> | 0.300     | -1.485            | -0.431 | 0.060  | -0.490 | 0.121        |
| IC <sup>M2</sup>  | N-H <sub>N</sub>                | 0.221     | -0.866            | -0.268 | 0.052  | -0.320 | 0.162        |
|                   | H <sub>N</sub> -O <sub>yl</sub> | 0.100     | 0.166             | -0.033 | 0.075  | -0.107 | 0.694        |
| TS <sup>M2</sup>  | N-H <sub>N</sub>                | 0.218     | -0.832            | -0.261 | 0.053  | -0.314 | 0.168        |
|                   | H <sub>N</sub> -O <sub>yl</sub> | 0.104     | 0.156             | -0.037 | 0.076  | -0.113 | 0.673        |
| INT <sup>M2</sup> | N-H <sub>N</sub>                | 0.031     | 0.085             | -0.001 | 0.022  | -0.023 | 0.968        |
|                   | H <sub>N</sub> -O <sub>yl</sub> | 0.303     | -1.509            | -0.436 | 0.059  | -0.495 | 0.119        |

Table S3. The values of  $\rho(r)$ ,  $\nabla^2\rho(r)$ ,  $H(r)$ ,  $G(r)$  and  $V(r)$  (au) of the N/C-H and H-O<sub>yl</sub> bonds for the structures of Np(VI) reduction with DMHA at the B3LYP/ECP60MWB/6-31G(d) level of theory.

|                   | Bond                            | $\rho(r)$ | $\nabla^2\rho(r)$ | $H(r)$ | $G(r)$ | $V(r)$ | $-G(r)/V(r)$ |
|-------------------|---------------------------------|-----------|-------------------|--------|--------|--------|--------------|
| IC <sup>D1</sup>  | O-H <sub>O</sub>                | 0.337     | -1.809            | -0.510 | 0.058  | -0.568 | 0.102        |
|                   | H <sub>O</sub> -O <sub>yl</sub> | 0.021     | 0.072             | 0.000  | 0.018  | -0.018 | 1.008        |
| TS <sup>D1</sup>  | O-H <sub>O</sub>                | 0.308     | -1.615            | -0.459 | 0.055  | -0.514 | 0.107        |
|                   | H <sub>O</sub> -O <sub>yl</sub> | 0.039     | 0.124             | -0.001 | 0.032  | -0.033 | 0.973        |
| INT <sup>D1</sup> | O-H <sub>O</sub>                | 0.046     | 0.141             | -0.002 | 0.037  | -0.040 | 0.945        |
|                   | H <sub>O</sub> -O <sub>yl</sub> | 0.292     | -1.412            | -0.413 | 0.060  | -0.474 | 0.127        |
| IC <sup>D2</sup>  | C-H <sub>C</sub>                | 0.263     | -0.937            | -0.263 | 0.029  | -0.292 | 0.100        |
|                   | H <sub>C</sub> -O <sub>yl</sub> | 0.020     | 0.059             | -0.000 | 0.015  | -0.015 | 0.986        |
| TS <sup>D2</sup>  | C-H <sub>C</sub>                | 0.171     | -0.353            | -0.124 | 0.036  | -0.161 | 0.226        |
|                   | H <sub>C</sub> -O <sub>yl</sub> | 0.106     | 0.151             | -0.034 | 0.072  | -0.107 | 0.678        |
| INT <sup>D2</sup> | C-H <sub>C</sub>                | -         | -                 | -      | -      | -      | -            |
|                   | H <sub>C</sub> -O <sub>yl</sub> | 0.290     | -1.389            | -0.407 | 0.060  | -0.467 | 0.128        |

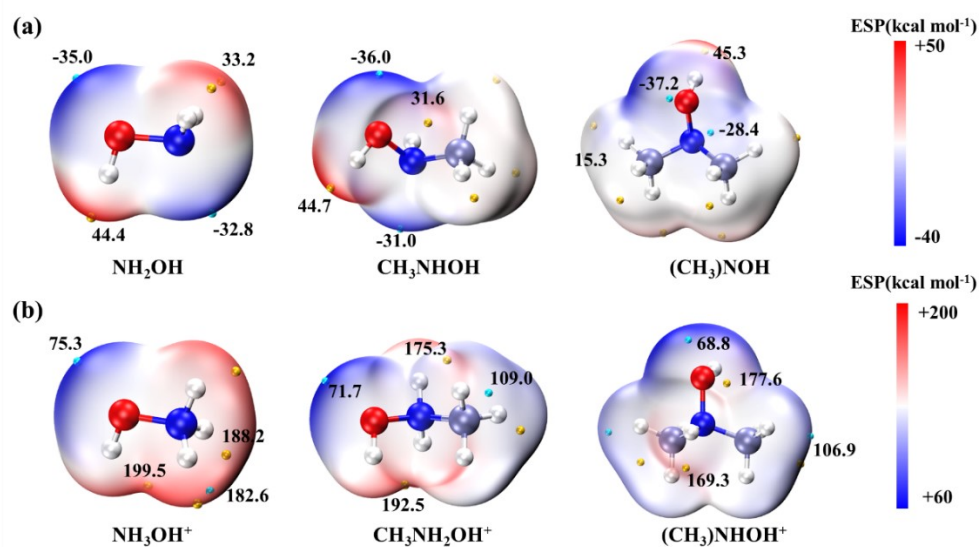

Figure S1 Electrostatic potential maps for HA, MHA, DMHA and the corresponding protonated forms.

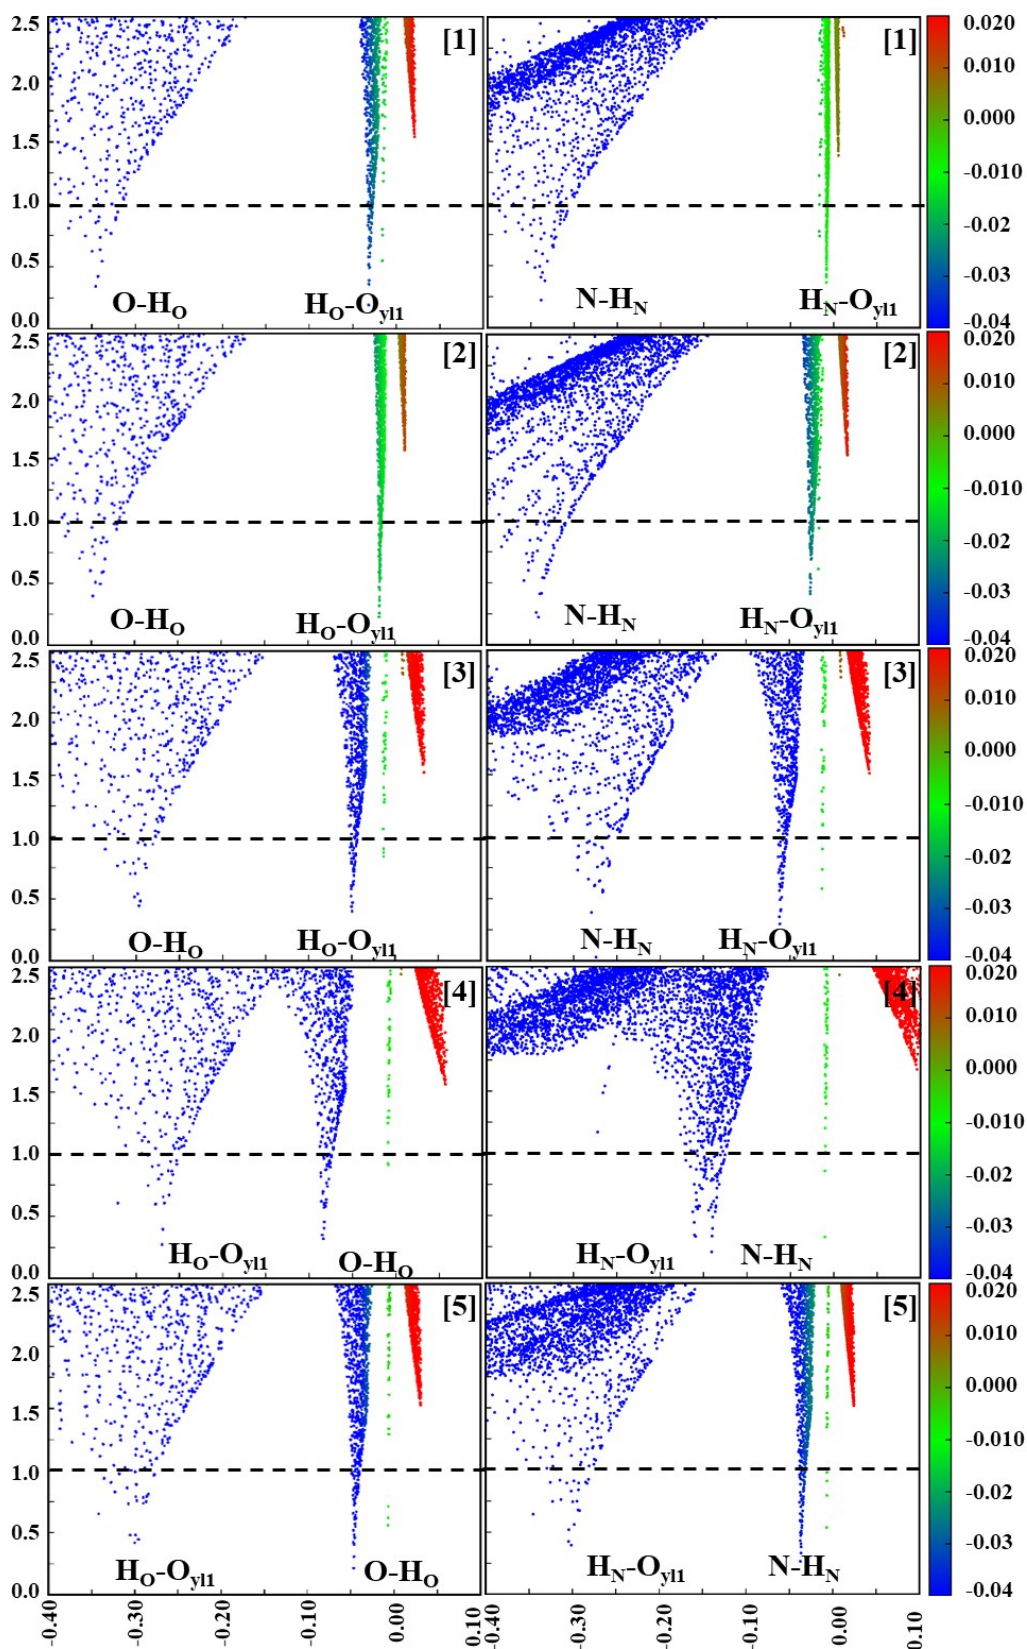

Figure S2. IRI scatter plots between IRI and  $\text{sign}(\lambda_2)\rho$  corresponding to the five points along the IRC for the  $[\text{Np}^{\text{VI}}\text{O}_2(\text{H}_2\text{O})_5]^{2+}$  reduction by HA.

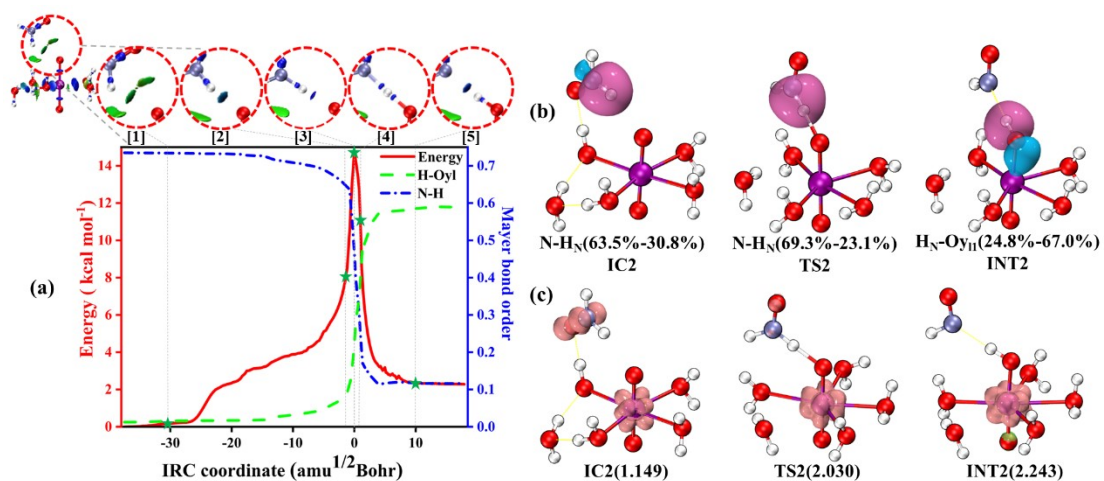

Figure S3. Mayer bond orders of the H<sub>N</sub>-O<sub>yl</sub> and N-H<sub>N</sub> bonds and color-filled IRI isosurface diagrams for the points along the IRC of TS2(a); LMO diagrams of IC2, TS2 and INT2(b); Spin density diagram of IC2, TS2 and INT2(c) for the second  $[\text{Np}^{\text{VI}}\text{O}_2(\text{H}_2\text{O})_5]^{2+}$  reduction by HA.



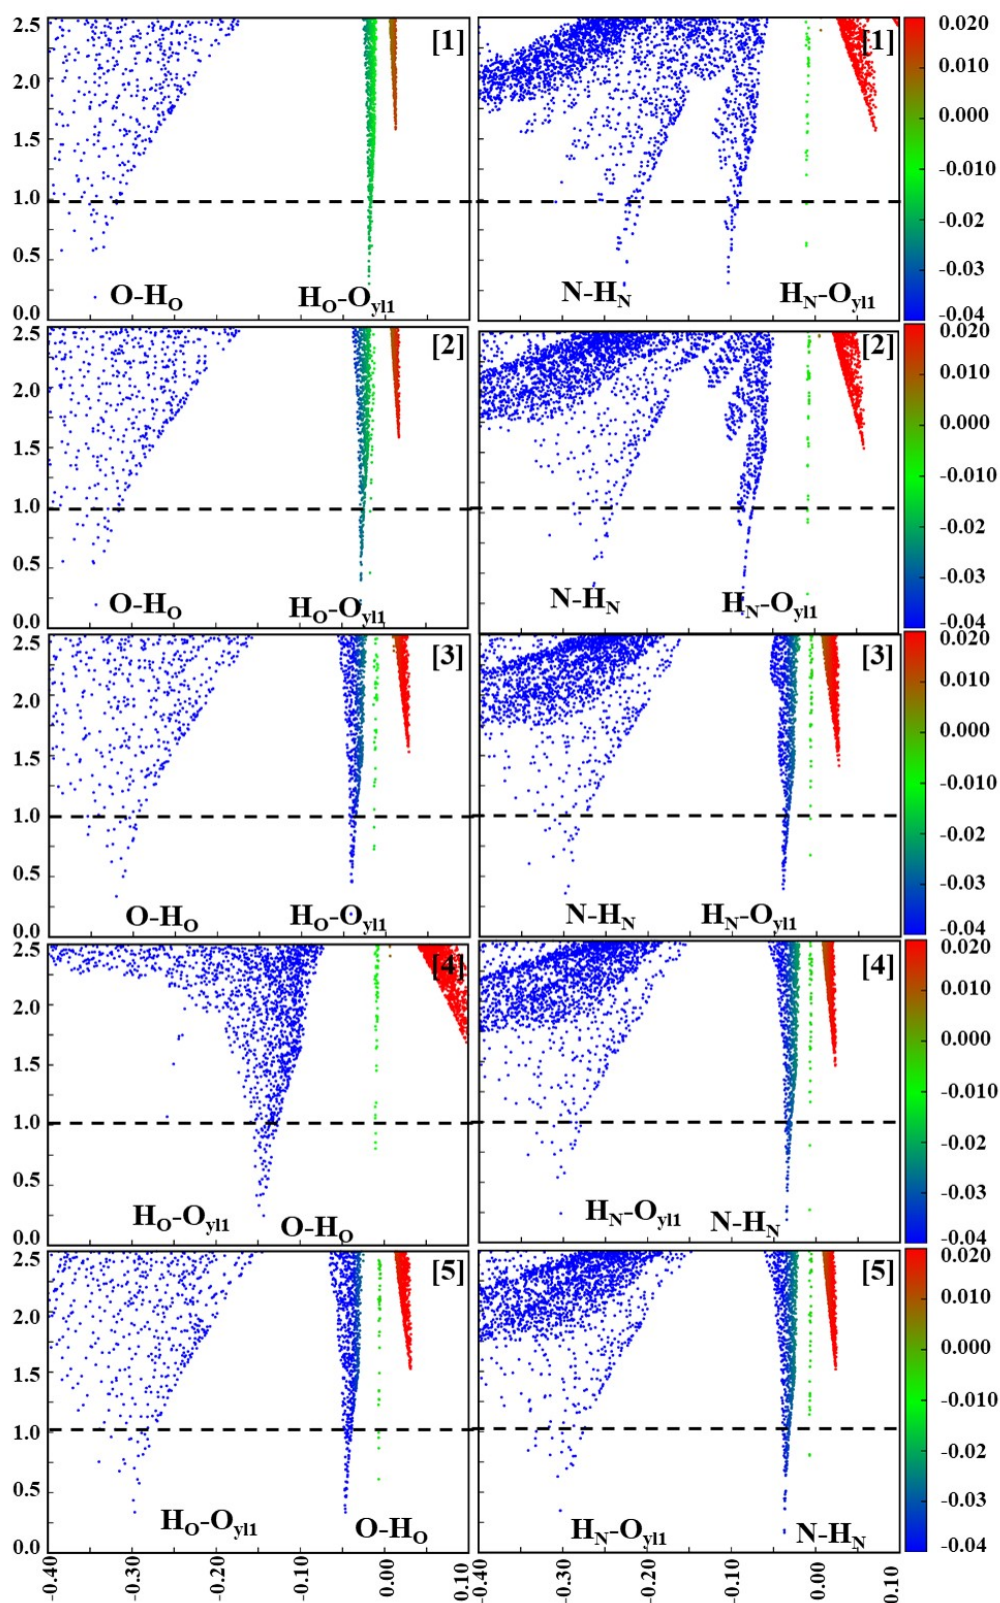

Figure S4. IRI scatter plots between IRI and  $\text{sign}(\lambda_2)\rho$  corresponding to the five points along the IRC for the  $[\text{Np}^{\text{VI}}\text{O}_2(\text{H}_2\text{O})_5]^{2+}$  reduction by MHA.

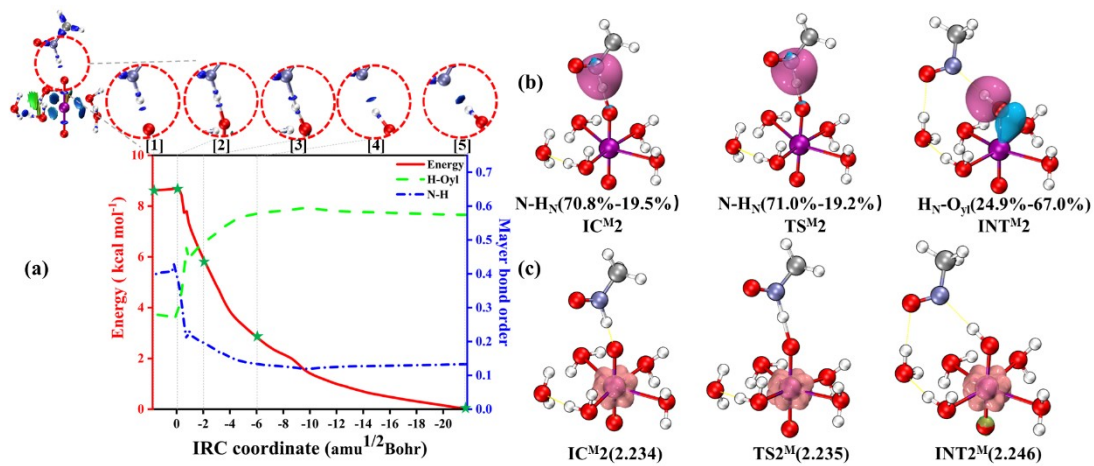

Figure S5. Mayer bond orders of the H<sub>N</sub>-O<sub>yl</sub> and N-H<sub>N</sub> bonds and color-filled IRI isosurface diagrams for the points along the IRC of TS<sup>M2</sup>(a); LMO diagram of IC<sup>M2</sup>, TS<sup>M2</sup> and INT<sup>M2</sup>(b); Spin density diagram of IC<sup>M2</sup>, TS<sup>M2</sup> and INT<sup>M2</sup>(c) for the second Np(VI) reduction by MHA.

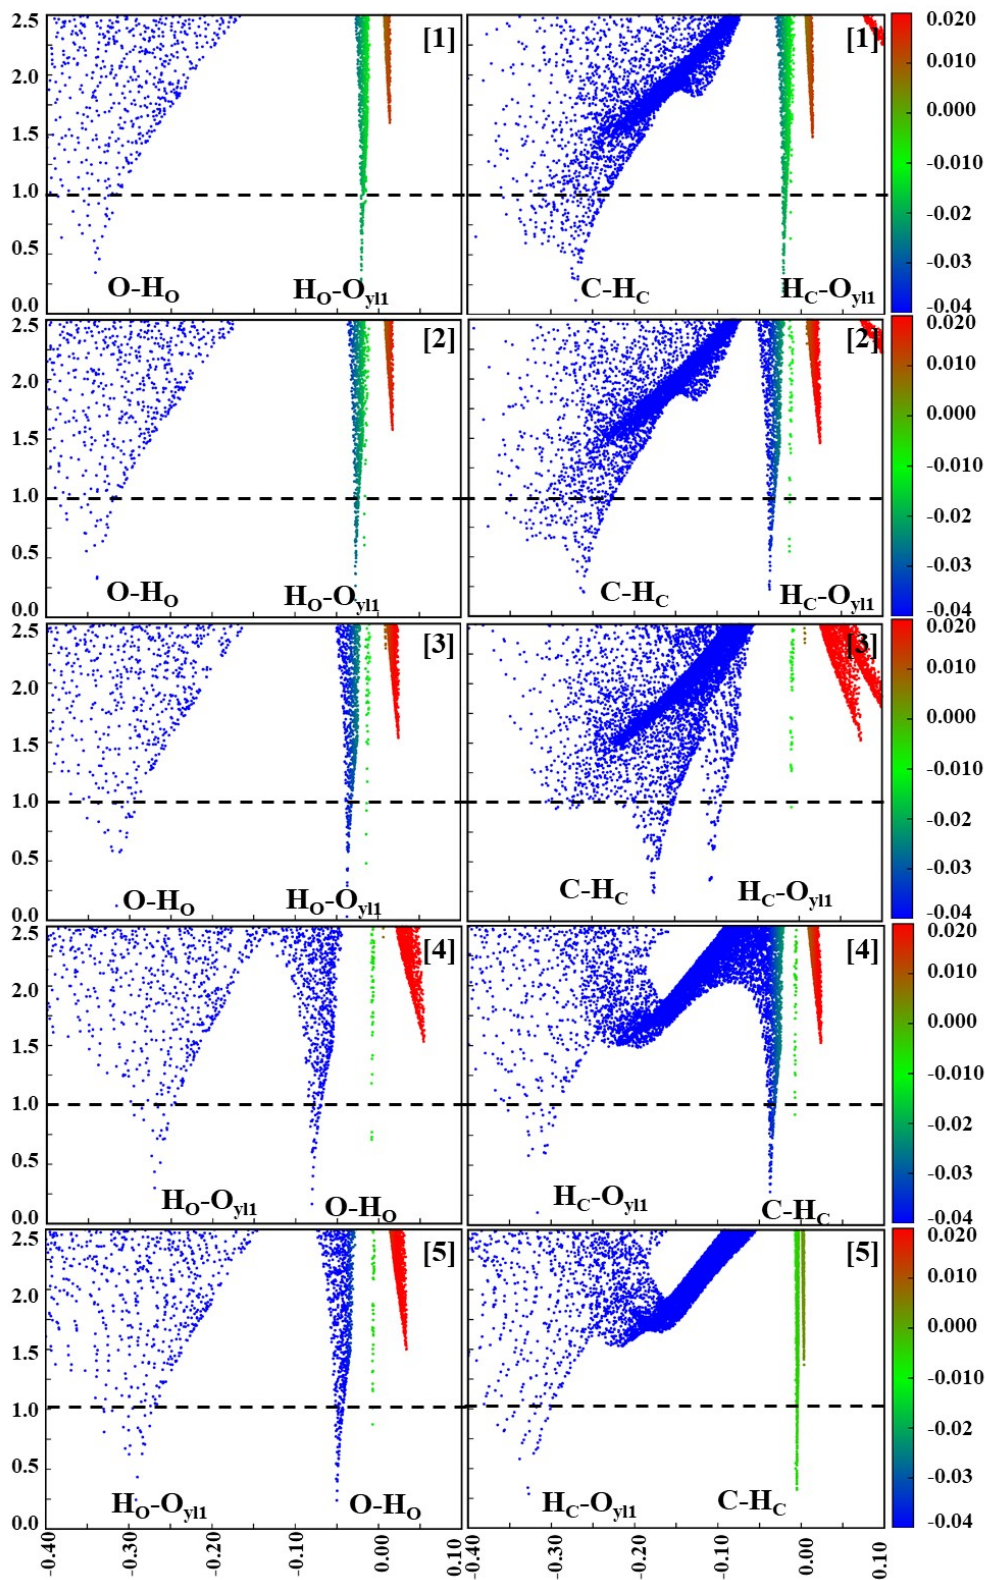

Figure S6. IRI scatter plots between IRI and  $\text{sign}(\lambda_2)\rho$  corresponding to the five points along the IRC for the  $[\text{Np}^{\text{VI}}\text{O}_2(\text{H}_2\text{O})_5]^{2+}$  reduction by DMHA.



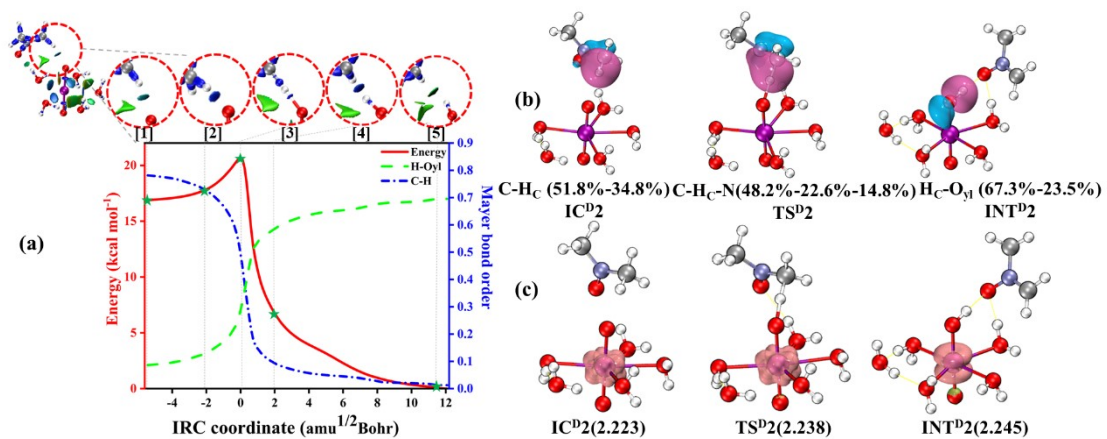

Figure S7. Mayer bond orders of the H<sub>C</sub>-O<sub>yl</sub> and C-H<sub>C</sub> bonds and color-filled IRI isosurface diagrams for the points along the IRC of TS<sup>D2</sup>(a); LMO diagram of IC<sup>D2</sup>, TS<sup>D2</sup> and INT<sup>D2</sup>(b); Spin density diagram of IC<sup>D2</sup>, TS<sup>D2</sup> and INT<sup>D2</sup>(c) for second  $[\text{Np}^{\text{VI}}\text{O}_2(\text{H}_2\text{O})_5]^{2+}$  reduction by DMHA.

## Cartesian coordinates

### IC1

| Atom | X           | Y           | Z (Angstrom) |
|------|-------------|-------------|--------------|
| Np   | 0.26920700  | -0.31715400 | 0.05902200   |
| O    | -0.99305500 | -2.40314300 | -0.73614900  |
| H    | -1.15051000 | -2.30271700 | -1.69264000  |
| O    | 2.45134400  | -0.31677300 | -1.25211700  |
| H    | 2.77528000  | 0.61669700  | -1.05904500  |
| O    | 3.11107400  | 2.18325400  | -0.55489200  |
| H    | 2.70231800  | 2.74869000  | -1.23291700  |
| O    | 1.05786400  | 1.77403700  | 1.34143100   |
| H    | 0.38747100  | 2.48119100  | 1.36100500   |
| O    | -1.91209100 | -0.31578100 | 1.39304900   |
| H    | -2.42692800 | 0.39757300  | 0.92771300   |
| H    | -2.33221500 | -1.15188400 | 1.11975800   |
| H    | -0.38804200 | -3.16354200 | -0.66191600  |
| H    | 3.04808300  | -0.89801200 | -0.74779000  |
| H    | 2.46402700  | 2.19576500  | 0.18523700   |
| H    | 1.25527800  | 1.57601000  | 2.27502300   |
| O    | -0.45327800 | 0.70041400  | -1.17945100  |
| O    | 0.99500300  | -1.32603500 | 1.29199700   |
| N    | -4.14510000 | 1.06410700  | -0.86889700  |
| O    | -3.08706900 | 1.66544100  | -0.06142700  |
| H    | -4.55639400 | 0.38482200  | -0.22574400  |
| H    | -2.31977900 | 1.65724300  | -0.66286900  |
| H    | -4.83750600 | 1.81342300  | -0.93214600  |

## TS1

| Atom | X           | Y           | Z (Angstrom) |
|------|-------------|-------------|--------------|
| Np   | 0.30018000  | -0.32553400 | 0.09468600   |
| O    | 0.30665400  | -2.52956300 | -1.24068800  |
| H    | 0.43641200  | -2.30938400 | -2.18040800  |
| O    | 2.41361600  | 0.43435600  | -1.15867900  |
| H    | 2.35554800  | 1.41739300  | -0.97410200  |
| O    | 2.04025600  | 3.01690200  | -0.47049500  |
| H    | 1.45016900  | 3.36185100  | -1.16248400  |
| O    | 0.26677100  | 1.89765800  | 1.42210400   |
| H    | -0.60370000 | 2.33462700  | 1.40816900   |
| O    | -1.81294700 | -1.10757200 | 1.39662500   |
| H    | -2.48754700 | -0.48413600 | 1.06468300   |
| H    | -2.06372000 | -1.96841400 | 1.01594700   |
| H    | 1.10542000  | -3.02729800 | -0.99156900  |
| H    | 3.16186300  | 0.12658900  | -0.61816000  |
| H    | 1.42795300  | 2.76315800  | 0.25586200   |
| H    | 0.49382700  | 1.80102600  | 2.36414400   |
| O    | -0.75166700 | 0.45073100  | -1.17939200  |
| O    | 1.34603200  | -1.08620800 | 1.33465400   |
| N    | -4.04473500 | 0.76233200  | -0.90318200  |
| O    | -3.03876700 | 1.15313400  | -0.07645000  |
| H    | -4.93709100 | 0.97934600  | -0.46223300  |
| H    | -2.16695000 | 0.99164700  | -0.56857100  |
| H    | -3.93538200 | 1.11642300  | -1.85625700  |

## INT1

| Atom | X           | Y           | Z (Angstrom) |
|------|-------------|-------------|--------------|
| Np   | 0.31839800  | -0.31304400 | 0.10321200   |
| O    | 0.34175500  | -2.52673500 | -1.20733500  |
| H    | 0.51833700  | -2.33829100 | -2.14594900  |
| O    | 2.43429300  | 0.38884300  | -1.15030100  |
| H    | 2.40815400  | 1.37222200  | -0.95722200  |
| O    | 2.11436800  | 2.97220500  | -0.47807900  |
| H    | 1.55983600  | 3.31588900  | -1.19966700  |
| O    | 0.27299400  | 1.92009900  | 1.41163500   |
| H    | -0.59484100 | 2.36112500  | 1.37422000   |
| O    | -1.82011700 | -1.02164000 | 1.37058200   |
| H    | -2.47355800 | -0.41254200 | 0.95525200   |
| H    | -2.04756100 | -1.90233100 | 1.02230200   |
| H    | 1.10634100  | -3.05265400 | -0.91260300  |
| H    | 3.17417100  | 0.04840500  | -0.61749200  |
| H    | 1.47031300  | 2.74494900  | 0.22929500   |
| H    | 0.49257000  | 1.85805100  | 2.35810000   |
| O    | -0.79531900 | 0.47184300  | -1.40408000  |
| O    | 1.35785200  | -1.05835000 | 1.38773800   |
| N    | -4.28607100 | 0.83993800  | -0.74374600  |
| O    | -3.16091900 | 0.92947100  | -0.12698400  |
| H    | -5.12830700 | 0.66963700  | -0.19369900  |
| H    | -1.69328300 | 0.73277000  | -1.04684600  |
| H    | -4.35995500 | 1.23039100  | -1.68361300  |

**IC2**

| Atom | X           | Y           | Z (Angstrom) |
|------|-------------|-------------|--------------|
| Np   | -0.46997300 | -0.04410300 | -0.06612100  |
| O    | -0.30729700 | 1.93725300  | 1.44351400   |
| H    | 0.22983800  | 1.65896900  | 2.20700500   |
| O    | 1.35253800  | 3.20633600  | -0.20722100  |
| H    | 1.63843300  | 2.34800100  | -0.59633800  |
| O    | 1.77921300  | 0.56332800  | -1.08165700  |
| H    | 2.52465600  | -0.02652600 | -0.76631500  |
| O    | -1.16488200 | -2.14794700 | -1.33373500  |
| H    | -1.30275600 | -2.85502100 | -0.67802700  |
| O    | -2.62845500 | -0.71871900 | 1.17040900   |
| H    | -2.38046600 | -0.84077200 | 2.10469400   |
| H    | -3.22028200 | 0.05559800  | 1.17068200   |
| H    | 0.30164300  | 2.52027800  | 0.88991400   |
| H    | 0.76126900  | 3.58236200  | -0.88239200  |
| H    | 1.75818900  | 0.48799100  | -2.05249700  |
| H    | -2.04442300 | -1.99304200 | -1.72299500  |
| O    | 0.33448400  | -1.03334600 | 1.14501200   |
| O    | -1.26423900 | 0.93988100  | -1.27905300  |
| N    | 3.42831200  | -1.56175100 | 0.93298300   |
| O    | 3.76512900  | -1.01216000 | -0.18377500  |
| H    | 4.06254900  | -2.25160600 | 1.33479700   |
| H    | 2.44874400  | -1.52939600 | 1.22191900   |



**TS2**

| Atom | X           | Y           | Z (Angstrom) |
|------|-------------|-------------|--------------|
| Np   | -0.41918700 | 0.00771400  | -0.12132300  |
| O    | -1.52382800 | 0.96314400  | 2.19273800   |
| H    | -0.77652000 | 0.98489300  | 2.81538900   |
| O    | 0.82917100  | 2.79794200  | 0.31131200   |
| H    | 1.08826600  | 2.40557200  | -0.54855600  |
| O    | 1.41627400  | 1.01871900  | -1.93958700  |
| H    | 2.37902100  | 1.13363500  | -1.86256800  |
| O    | -0.41731700 | -2.17151600 | -1.56328900  |
| H    | -0.76310800 | -2.89702900 | -1.01430200  |
| O    | -2.23492000 | -1.52304300 | 1.04261700   |
| H    | -1.71701900 | -2.25986800 | 1.41181400   |
| H    | -2.32178800 | -0.89007000 | 1.78394300   |
| H    | -1.76595700 | 1.89664300  | 2.06610600   |
| H    | -0.08322700 | 3.09713500  | 0.15807300   |
| H    | 1.14317300  | 1.65141100  | -2.62627400  |
| H    | -1.10793900 | -2.02804800 | -2.23443000  |
| O    | 0.89003500  | -0.75969000 | 0.94118400   |
| O    | -1.70274500 | 0.75888500  | -1.15112600  |
| N    | 3.48820200  | -0.43488500 | 0.50482800   |
| O    | 4.26948600  | -1.14848800 | 1.07562600   |
| H    | 3.86606900  | 0.29925200  | -0.12806100  |
| H    | 2.41673300  | -0.55437800 | 0.65230000   |

**INT2**

| Atom | X           | Y           | Z (Angstrom) |
|------|-------------|-------------|--------------|
| Np   | -0.41255600 | 0.01301600  | -0.12633100  |
| O    | -1.68955600 | 0.81143200  | 1.99720100   |
| H    | -1.04820900 | 0.83189700  | 2.72992900   |
| O    | 0.51699600  | 2.97668600  | 0.53115100   |
| H    | 0.88811300  | 2.62111200  | -0.30160700  |
| O    | 1.31831700  | 1.32424900  | -1.66109000  |
| H    | 2.16288900  | 0.87332300  | -1.83340500  |
| O    | -0.38819200 | -2.17787700 | -1.48649000  |
| H    | -0.13393000 | -2.87298000 | -0.85365900  |
| O    | -2.24419500 | -1.80196000 | 0.85727700   |
| H    | -1.63895000 | -2.43092700 | 1.28771100   |
| H    | -2.48179700 | -1.18031500 | 1.57095100   |
| H    | -1.92858000 | 1.74475300  | 1.85589900   |
| H    | -0.38561700 | 3.23426000  | 0.28005100   |
| H    | 0.91455600  | 1.45317700  | -2.53741000  |
| H    | -1.32335400 | -2.36500900 | -1.68365600  |
| O    | 0.91697100  | -0.89052400 | 1.10304600   |
| O    | -1.68448200 | 0.76413800  | -1.16134600  |
| N    | 3.70710300  | -0.43710000 | 0.37876300   |
| O    | 4.69804800  | -0.95385300 | 0.83537400   |
| H    | 3.97556000  | 0.23704600  | -0.38624500  |
| H    | 1.86609400  | -0.71544300 | 0.84790300   |

**ICM1**

| Atom | X           | Y           | Z (Angstrom) |
|------|-------------|-------------|--------------|
| Np   | 0.61677600  | -0.26660200 | 0.05137200   |
| O    | 0.60856700  | -2.45646000 | -1.25837700  |
| H    | 0.44772600  | -2.27738500 | -2.20226300  |
| O    | 2.38390400  | 0.77060300  | -1.41372000  |
| H    | 2.22970800  | 1.72654900  | -1.13737700  |
| O    | 1.73782900  | 3.17468400  | -0.44041100  |
| H    | 1.02044400  | 3.46716500  | -1.02937100  |
| O    | 0.38613200  | 1.66162900  | 1.63212600   |
| H    | -0.54481400 | 1.90681600  | 1.78683400   |
| O    | -1.17840700 | -1.28807400 | 1.53214200   |
| H    | -1.99137900 | -0.79650300 | 1.24254400   |
| H    | -1.30897800 | -2.20375400 | 1.22501800   |
| H    | 1.50191900  | -2.84307800 | -1.22230000  |
| H    | 3.23389500  | 0.52453800  | -1.00621700  |
| H    | 1.26720200  | 2.80285500  | 0.33609000   |
| H    | 0.77289100  | 1.50326400  | 2.51253200   |
| O    | -0.62427500 | 0.45658700  | -0.96814300  |
| O    | 1.86784000  | -0.96727300 | 1.05851800   |
| N    | -4.02664700 | -0.19860500 | -0.41502600  |
| O    | -3.09044400 | 0.44174900  | 0.51509100   |
| C    | -4.99174200 | 0.82434300  | -0.82258700  |
| H    | -5.77869000 | 0.32312100  | -1.39570700  |
| H    | -4.49801900 | 1.54968900  | -1.47547300  |
| H    | -5.44650600 | 1.35341700  | 0.02503900   |
| H    | -4.51044600 | -0.83962300 | 0.21425300   |
| H    | -2.34727200 | 0.69349600  | -0.06830100  |

**TSM1**

| Atom | X           | Y           | Z (Angstrom) |
|------|-------------|-------------|--------------|
| Np   | 0.62580700  | -0.26324600 | 0.04939100   |
| O    | 0.64545900  | -2.46018300 | -1.28862600  |
| H    | 0.47329300  | -2.22706000 | -2.21859700  |
| O    | 2.23044700  | 0.98507700  | -1.52588900  |
| H    | 2.03623400  | 1.88543700  | -1.13066900  |
| O    | 1.48432700  | 3.24546800  | -0.21827900  |
| H    | 0.83552500  | 3.67400200  | -0.80241100  |
| O    | -0.10357600 | 1.78218700  | 1.62180600   |
| H    | -1.07032800 | 1.88639100  | 1.57405200   |
| O    | -0.97146500 | -1.49918800 | 1.66634900   |
| H    | -1.84039100 | -1.09201600 | 1.47154500   |
| H    | -1.04390200 | -2.40902300 | 1.32543100   |
| H    | 1.55788500  | -2.80021300 | -1.28513400  |
| H    | 3.12880200  | 0.77303100  | -1.21739500  |
| H    | 0.93327200  | 2.83220400  | 0.48387800   |
| H    | 0.09846900  | 1.66365700  | 2.56651200   |
| O    | -0.79133300 | 0.30471200  | -0.92612600  |
| O    | 2.04306300  | -0.83652000 | 0.97306700   |
| N    | -4.05183400 | -0.16735500 | -0.14697200  |
| O    | -3.00163000 | 0.30450100  | 0.61471300   |
| C    | -4.43334600 | 0.68895800  | -1.25732500  |
| H    | -5.28667300 | 0.22399600  | -1.75410900  |
| H    | -3.59859100 | 0.76744100  | -1.95828300  |
| H    | -4.70908900 | 1.69187700  | -0.90384900  |
| H    | -4.80217200 | -0.39263900 | 0.50520600   |
| H    | -2.23184600 | 0.43410300  | -0.01291700  |

**INTM1**

| Atom | X           | Y           | Z (Angstrom) |
|------|-------------|-------------|--------------|
| Np   | 0.65469300  | -0.26831100 | 0.06514600   |
| O    | 0.72190700  | -2.48240400 | -1.25241700  |
| H    | 0.56225700  | -2.24219900 | -2.18285100  |
| O    | 2.27889100  | 0.96689800  | -1.49476000  |
| H    | 2.08786800  | 1.87217100  | -1.10909900  |
| O    | 1.54011100  | 3.25635500  | -0.23172300  |
| H    | 0.93238700  | 3.70629300  | -0.84326600  |
| O    | -0.14507400 | 1.79182800  | 1.50627300   |
| H    | -1.11365200 | 1.84229500  | 1.40936200   |
| O    | -1.07013100 | -1.42919600 | 1.59646400   |
| H    | -1.88804900 | -0.95172700 | 1.31817100   |
| H    | -1.16292000 | -2.31865600 | 1.20982800   |
| H    | 1.62922900  | -2.83597000 | -1.24276600  |
| H    | 3.16931600  | 0.74679000  | -1.16861600  |
| H    | 0.94368000  | 2.85299100  | 0.43763800   |
| H    | 0.01378800  | 1.69035100  | 2.46151500   |
| O    | -0.85617000 | 0.18461500  | -1.21731400  |
| O    | 2.02828500  | -0.71610300 | 1.16021000   |
| N    | -4.17618900 | -0.00280000 | 0.06021800   |
| O    | -2.98155600 | 0.24073400  | 0.48031100   |
| C    | -4.67200100 | 0.63915500  | -1.14223200  |
| H    | -5.62527500 | 0.18127700  | -1.41097300  |
| H    | -3.94447000 | 0.49732000  | -1.94524500  |
| H    | -4.81513500 | 1.71248700  | -0.96742600  |
| H    | -4.82701300 | -0.40070900 | 0.73930000   |
| H    | -1.71323500 | 0.28302300  | -0.70860100  |



**ICM2**

| Atom | X           | Y           | Z (Angstrom) |
|------|-------------|-------------|--------------|
| Np   | 0.68868700  | -0.05144900 | -0.06069000  |
| O    | 0.12840900  | 2.83643600  | 1.30574400   |
| H    | -0.57431400 | 2.18224400  | 1.46587500   |
| O    | 0.14066900  | -0.33879200 | 2.57371400   |
| H    | 0.38549600  | -1.28166100 | 2.47748900   |
| O    | 1.06111600  | -2.52268300 | 0.96429900   |
| H    | 0.59892000  | -3.17781100 | 0.41303300   |
| O    | 1.08070700  | -1.03560100 | -2.51050000  |
| H    | 0.34056600  | -0.70636200 | -3.04966100  |
| O    | 0.36520700  | 2.33896000  | -1.40084700  |
| H    | -0.54385800 | 2.23227400  | -1.72899300  |
| H    | 0.24820700  | 2.70609500  | -0.48771200  |
| H    | 0.92859600  | 2.37913400  | 1.61892900   |
| H    | 0.90869500  | 0.05829500  | 3.02092800   |
| H    | 2.00641300  | -2.71411200 | 0.83671400   |
| H    | 1.85467200  | -0.54891400 | -2.84456900  |
| O    | -1.17397800 | -0.28117800 | -0.30766500  |
| O    | 2.48473800  | 0.15872000  | 0.17271000   |
| N    | -3.69087100 | -0.11045500 | -0.11103600  |
| O    | -4.16092600 | 0.98521900  | -0.00874700  |
| C    | -4.52849000 | -1.28991500 | -0.15459700  |
| H    | -4.27814900 | -1.81723800 | -1.08434700  |
| H    | -5.57684400 | -1.00482800 | -0.09308100  |
| H    | -4.20743600 | -1.93139800 | 0.67657100   |
| H    | -2.53940700 | -0.20697000 | -0.18183100  |

**TSM2**

| Atom | X           | Y           | Z (Angstrom) |
|------|-------------|-------------|--------------|
| Np   | 0.68831000  | -0.05138700 | -0.06062300  |
| O    | 0.12800900  | 2.83696700  | 1.30497200   |
| H    | -0.57502900 | 2.18320600  | 1.46547800   |
| O    | 0.13972300  | -0.33841400 | 2.57373500   |
| H    | 0.38524300  | -1.28114600 | 2.47795300   |
| O    | 1.06083500  | -2.52236700 | 0.96452600   |
| H    | 0.59903900  | -3.17780600 | 0.41329200   |
| O    | 1.08042400  | -1.03550500 | -2.51017200  |
| H    | 0.34034100  | -0.70682300 | -3.04975100  |
| O    | 0.36461600  | 2.33778300  | -1.40104500  |
| H    | -0.54437800 | 2.23105600  | -1.72940100  |
| H    | 0.24752200  | 2.70580800  | -0.48825800  |
| H    | 0.92794600  | 2.37956400  | 1.61864500   |
| H    | 0.90723400  | 0.05945500  | 3.02115000   |
| H    | 2.00624100  | -2.71373600 | 0.83764800   |
| H    | 1.85440500  | -0.54891900 | -2.84435600  |
| O    | -1.17591300 | -0.28200400 | -0.30783600  |
| O    | 2.48410700  | 0.15877300  | 0.17244800   |
| N    | -3.68701800 | -0.11072400 | -0.11089000  |
| O    | -4.15812000 | 0.98476900  | -0.00862400  |
| C    | -4.52600500 | -1.28948200 | -0.15478300  |
| H    | -4.27578300 | -1.81727100 | -1.08425400  |
| H    | -5.57428000 | -1.00375900 | -0.09393500  |
| H    | -4.20625900 | -1.93120300 | 0.67666000   |
| H    | -2.52942300 | -0.20751200 | -0.18203000  |

**INTM2**

| Atom | X           | Y           | Z (Angstrom) |
|------|-------------|-------------|--------------|
| Np   | -0.77089900 | -0.02802100 | -0.03476800  |
| O    | 1.66184500  | -2.08447700 | 1.26031300   |
| H    | 2.40468400  | -1.76707100 | 0.70475500   |
| O    | 0.73022600  | 0.71475800  | 2.05507900   |
| H    | 0.43724800  | 1.63838000  | 1.88318300   |
| O    | -0.75256000 | 2.70943300  | 0.84985600   |
| H    | -0.60433700 | 3.34657500  | 0.13077900   |
| O    | -2.58558700 | 0.37584400  | -1.82388400  |
| H    | -2.18454600 | 0.16361400  | -2.68591400  |
| O    | -0.42447100 | -2.56182200 | -0.36515300  |
| H    | -0.07878300 | -2.65268900 | -1.27090200  |
| H    | 0.39441900  | -2.53415100 | 0.21258500   |
| H    | 1.30397100  | -1.25653200 | 1.63267400   |
| H    | 0.21017800  | 0.44275400  | 2.83239700   |
| H    | -1.64243400 | 2.91113400  | 1.18561500   |
| H    | -3.28706800 | -0.28955900 | -1.70736200  |
| O    | 0.64158000  | 0.28207600  | -1.44807100  |
| O    | -2.07118900 | -0.29884000 | 1.19036400   |
| N    | 3.43809800  | 0.29546800  | -0.58539200  |
| O    | 3.85952900  | -0.68073800 | 0.00286300   |
| C    | 4.44580800  | 1.30574300  | -0.89127900  |
| H    | 4.39682100  | 1.49124700  | -1.97051100  |
| H    | 5.43956200  | 0.99399600  | -0.56452000  |
| H    | 4.11943400  | 2.22799400  | -0.39389400  |
| H    | 1.56792200  | 0.33767900  | -1.08100900  |

**IC<sup>D1</sup>**

| Atom | X           | Y           | Z (Angstrom) |
|------|-------------|-------------|--------------|
| Np   | -0.87013700 | -0.03554400 | 0.09607000   |
| O    | -2.13427300 | 2.06458300  | -0.69838300  |
| H    | -2.32572800 | 2.02388800  | -1.65249300  |
| O    | -2.48759900 | -1.59890600 | -1.10859000  |
| H    | -2.00824400 | -2.17847300 | -1.72783000  |
| O    | 0.09445700  | -2.49118200 | 0.47524200   |
| H    | 0.95303800  | -2.46882500 | 0.01659700   |
| O    | 1.18680100  | 0.03958800  | 1.51136100   |
| H    | 2.01899300  | -0.08229200 | 0.92300500   |
| O    | 0.45394400  | 2.90524200  | 0.24745300   |
| H    | 1.03791800  | 2.38852600  | -0.33279200  |
| H    | -0.41931200 | 2.83048800  | -0.18292200  |
| H    | -2.99899700 | 2.15159400  | -0.25877600  |
| H    | -2.89240700 | -2.20328900 | -0.46070400  |
| H    | -0.48137100 | -3.00622300 | -0.11843000  |
| H    | 1.15591400  | -0.74172200 | 2.09216100   |
| O    | 0.13229700  | 0.02161700  | -1.34418700  |
| O    | -1.88559600 | -0.09935800 | 1.51764200   |
| N    | 3.33569300  | -0.10093900 | -0.08440800  |
| O    | 2.99333500  | 0.77622200  | -1.19464800  |
| H    | 2.04959500  | 0.57565200  | -1.35136200  |
| C    | 3.70535500  | -1.40312700 | -0.65313400  |
| H    | 3.97680400  | -2.07373900 | 0.16756000   |
| H    | 4.55077000  | -1.31216200 | -1.34812400  |
| C    | 4.46830200  | 0.54792700  | 0.57934900   |
| H    | 4.78790700  | -0.09011200 | 1.40760800   |
| H    | 5.30945500  | 0.69313000  | -0.11230300  |
| H    | 2.84405600  | -1.81977000 | -1.18264900  |
| H    | 4.14560500  | 1.51424900  | 0.97342400   |

**TSP1**

| Atom | X           | Y           | Z (Angstrom) |
|------|-------------|-------------|--------------|
| Np   | -0.81880700 | -0.03813400 | 0.11601100   |
| O    | -2.27250800 | 1.84213400  | -0.89692100  |
| H    | -2.41079700 | 1.78025600  | -1.85818800  |
| O    | -2.42560100 | -1.62765600 | -1.12794700  |
| H    | -1.91013200 | -2.08767200 | -1.81422900  |
| O    | 0.16214700  | -2.51403700 | 0.47524900   |
| H    | 1.01177100  | -2.50059100 | 0.00084800   |
| O    | 1.24089600  | -0.07136400 | 1.74513200   |
| H    | 2.03692600  | -0.22804100 | 1.18940800   |
| O    | 0.08823600  | 2.99096900  | 0.27653300   |
| H    | 0.71245100  | 2.51721200  | -0.29856000  |
| H    | -0.76819600 | 2.86181900  | -0.17828200  |
| H    | -3.16307200 | 1.86264800  | -0.50478400  |
| H    | -2.69508600 | -2.33108000 | -0.51085200  |
| H    | -0.43029400 | -3.01114200 | -0.11726900  |
| H    | 1.09703800  | -0.91951500 | 2.20255900   |
| O    | 0.20325500  | 0.04332800  | -1.37628900  |
| O    | -1.87095200 | -0.12695100 | 1.55483000   |
| N    | 3.40004200  | -0.02779700 | -0.19685600  |
| O    | 2.71859300  | 0.98798900  | -0.83982700  |
| H    | 1.84506100  | 0.60022700  | -1.13298600  |
| C    | 3.57103900  | -1.22650300 | -1.01385300  |
| H    | 3.97802400  | -2.01736100 | -0.38160700  |
| H    | 4.26201900  | -1.01689700 | -1.84240000  |
| C    | 4.57072300  | 0.50500700  | 0.48201300   |
| H    | 5.01779700  | -0.30285200 | 1.06416900   |
| H    | 5.30076900  | 0.87955300  | -0.24902800  |
| H    | 2.60257800  | -1.52798500 | -1.41737100  |
| H    | 4.25876200  | 1.31615100  | 1.14253300   |



**INTD1**

| Atom | X           | Y           | Z (Angstrom) |
|------|-------------|-------------|--------------|
| Np   | -0.80911500 | -0.04684300 | 0.13436800   |
| O    | -2.28754600 | 1.83660000  | -1.03893700  |
| H    | -2.43685800 | 1.59381500  | -1.96943400  |
| O    | -2.41357000 | -1.66393100 | -1.08251700  |
| H    | -1.87811900 | -2.12452700 | -1.75352000  |
| O    | 0.19822400  | -2.49971400 | 0.51781400   |
| H    | 1.03342100  | -2.47297800 | 0.01759600   |
| O    | 1.00825300  | 0.34067100  | 1.92994600   |
| H    | 1.86322300  | 0.05108300  | 1.56692800   |
| O    | 0.14193400  | 2.98449500  | 0.03952000   |
| H    | 0.77083800  | 2.40734800  | -0.42634800  |
| H    | -0.69941400 | 2.82134700  | -0.43040200  |
| H    | -3.17440900 | 1.89093700  | -0.64229400  |
| H    | -2.68075700 | -2.36391900 | -0.46025900  |
| H    | -0.40318400 | -3.00299500 | -0.06001500  |
| H    | 0.81659600  | -0.29721000 | 2.64049100   |
| O    | 0.26138000  | -0.03201300 | -1.57863200  |
| O    | -1.91137900 | -0.16568000 | 1.56358500   |
| N    | 3.49940000  | -0.00693500 | -0.31235100  |
| O    | 2.68186100  | 0.86722900  | -0.81148000  |
| H    | 1.20734200  | 0.25704400  | -1.37772900  |
| C    | 3.67997200  | -1.27318500 | -1.01552600  |
| H    | 4.06804500  | -2.01928200 | -0.31910500  |
| H    | 4.39282300  | -1.14464600 | -1.84065800  |
| C    | 4.54154400  | 0.48139800  | 0.58605300   |
| H    | 4.87981100  | -0.33913100 | 1.22261400   |
| H    | 5.39236700  | 0.86304300  | 0.00663300   |
| H    | 2.71535900  | -1.59064900 | -1.41530700  |
| H    | 4.12243900  | 1.28513300  | 1.19349700   |

**IC<sup>D2</sup>**

| Atom | X           | Y           | Z (Angstrom) |
|------|-------------|-------------|--------------|
| Np   | -0.74938800 | -0.07317500 | -0.14626100  |
| O    | -2.52057200 | 2.52701100  | 0.82144200   |
| H    | -2.74739800 | 1.61696600  | 1.09699500   |
| O    | -2.58362100 | -0.42595200 | 1.66766900   |
| H    | -3.16238900 | -1.15354000 | 1.38016000   |
| O    | -0.61611300 | -2.74917400 | 0.51120100   |
| H    | -1.32324100 | -3.12081300 | -0.04474900  |
| O    | 1.04393200  | -1.54358800 | -1.57761300  |
| H    | 0.92309600  | -2.25290700 | -0.91777200  |
| O    | -0.43878600 | 2.41951400  | -1.09673300  |
| H    | -0.84164100 | 2.34764400  | -1.97952300  |
| H    | -1.19850700 | 2.65554200  | -0.50797500  |
| H    | -2.02562900 | 2.87483600  | 1.58318500   |
| H    | -2.16968900 | -0.74566400 | 2.48820600   |
| H    | -1.03299300 | -2.65424100 | 1.38645800   |
| H    | 1.90639300  | -1.15195200 | -1.35224700  |
| O    | -2.02355300 | -0.35069200 | -1.43826100  |
| O    | 0.52328100  | 0.20195500  | 1.16389500   |
| N    | 4.04110900  | 0.21733600  | 0.16718700   |
| O    | 3.67545500  | 0.14842300  | -0.97200700  |
| C    | 3.54018400  | -0.73297400 | 1.15595800   |
| H    | 2.53857000  | -0.35304100 | 1.43314100   |
| H    | 4.20814900  | -0.74703500 | 2.01491100   |
| C    | 4.95043600  | 1.28577000  | 0.58492200   |
| H    | 4.49576500  | 1.77878600  | 1.45036300   |
| H    | 5.87727500  | 0.79972000  | 0.91212800   |
| H    | 3.43047100  | -1.70100400 | 0.66558300   |
| H    | 5.10314000  | 1.95386200  | -0.25895200  |

**TSP2**

| Atom | X           | Y           | Z (Angstrom) |
|------|-------------|-------------|--------------|
| Np   | -0.67811500 | -0.08638300 | -0.14006800  |
| O    | -2.42423600 | 2.66623000  | 0.62487100   |
| H    | -2.64263200 | 1.75138900  | 0.88289300   |
| O    | -2.51072100 | -0.43907900 | 1.65832400   |
| H    | -3.03811100 | -1.20602400 | 1.37303600   |
| O    | -0.62150600 | -2.73085000 | 0.52048700   |
| H    | -1.31684100 | -3.10314000 | -0.05019000  |
| O    | 1.10496300  | -1.57875500 | -1.55230700  |
| H    | 0.98312000  | -2.30275300 | -0.90977300  |
| O    | -0.32199100 | 2.37518200  | -1.14879200  |
| H    | -0.68961700 | 2.27144100  | -2.04363100  |
| H    | -1.09990700 | 2.64992900  | -0.59683300  |
| H    | -1.96744900 | 3.01912500  | 1.40815400   |
| H    | -2.08368300 | -0.72828200 | 2.48411900   |
| H    | -1.05184500 | -2.65086800 | 1.39076300   |
| H    | 2.00007000  | -1.23503300 | -1.36559600  |
| O    | -1.94057400 | -0.35723700 | -1.42679400  |
| O    | 0.61623800  | 0.20542900  | 1.23924200   |
| N    | 3.73076000  | 0.17945300  | 0.22636900   |
| O    | 3.61949800  | -0.07216100 | -0.97104400  |
| C    | 3.12344500  | -0.59469400 | 1.19712500   |
| H    | 1.93737200  | -0.16816400 | 1.22083200   |
| H    | 3.53835600  | -0.42459900 | 2.18821000   |
| C    | 4.44139600  | 1.41518500  | 0.61672800   |
| H    | 3.81606700  | 1.95492600  | 1.33109800   |
| H    | 5.37476800  | 1.11671100  | 1.10237600   |
| H    | 3.00247400  | -1.62960700 | 0.87936900   |
| H    | 4.62484800  | 1.98939500  | -0.28806900  |

**INTD2**

| Atom | X           | Y           | Z (Angstrom) |
|------|-------------|-------------|--------------|
| Np   | -0.71189300 | -0.14779700 | -0.19022300  |
| O    | -2.96292900 | 2.23354500  | 1.02306800   |
| H    | -2.92632600 | 1.27786100  | 1.24439900   |
| O    | -2.52235800 | -0.54317000 | 1.61376000   |
| H    | -3.10595000 | -1.28370700 | 1.37095700   |
| O    | -0.20503600 | -2.52414900 | 0.75243400   |
| H    | -0.49758900 | -3.12437400 | 0.04316400   |
| O    | 1.36134800  | -0.92557500 | -1.50722100  |
| H    | 1.59729400  | -1.79460700 | -1.13723200  |
| O    | -1.25467800 | 2.21954800  | -1.09576600  |
| H    | -1.78099600 | 2.08122100  | -1.90256800  |
| H    | -1.93224700 | 2.37829700  | -0.37655500  |
| H    | -2.45025600 | 2.65375400  | 1.73532500   |
| H    | -2.12745600 | -0.79170700 | 2.46879400   |
| H    | -0.88133600 | -2.62898900 | 1.44664400   |
| H    | 2.01271500  | -0.29127200 | -1.09391700  |
| O    | -1.82557800 | -0.86947300 | -1.40538900  |
| O    | 0.56925300  | 0.66169600  | 1.13501500   |
| N    | 4.01856200  | 0.30999200  | 0.28429400   |
| O    | 2.91245000  | 0.85129900  | -0.19837900  |
| C    | 4.10624800  | -0.91676800 | 0.66784300   |
| H    | 1.48986500  | 0.72026500  | 0.72003500   |
| H    | 5.05268300  | -1.28456400 | 1.03982900   |
| C    | 5.15645400  | 1.24352500  | 0.33143300   |
| H    | 6.04009600  | 0.73839200  | 0.71910400   |
| H    | 5.32785500  | 1.60377800  | -0.68446900  |
| H    | 3.22962500  | -1.54905500 | 0.59861800   |
| H    | 4.87210700  | 2.07955300  | 0.97271200   |
